# Supplementary material for: Magnetic ZnO surface-imprinted polymers prepared by ARGET ATRP and the application for antibiotics selective recognition
Source: Royal Society of Chemistry journal article supplement (doi:10.1039/c2ra20282d), 2012-01-01
Supplement: c2ra20282d.pdf [file c2ra20282d.pdf]

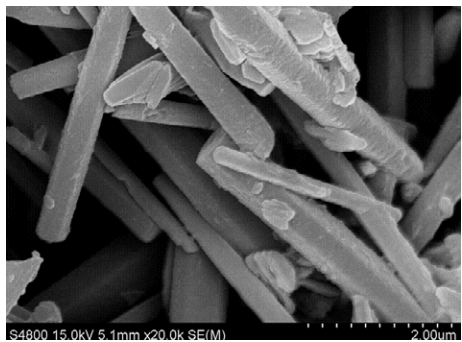

**Fig. S1** FE-SEM image of ZnO nanorods.

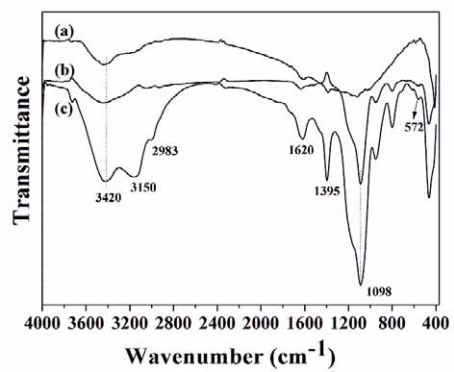

Fig. S2 FT-IR spectra of ZnO nanorods (a), ZnO/SiO<sub>2</sub> (b), ZnO-Br (c).

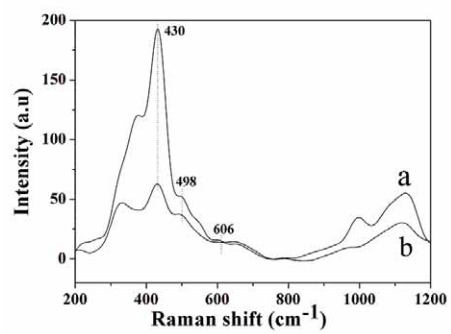

Fig. S3 Raman spectra of ZnO-MIPs (a) and ZnO-NIPs (b).

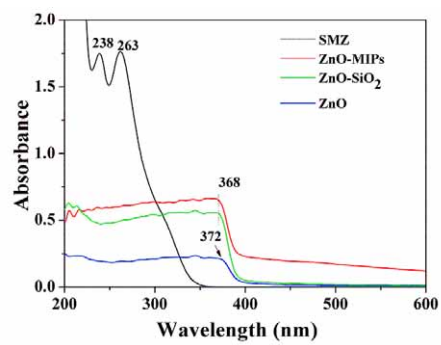

Fig. S4 UV-vis adsorption spectra of SMZ, ZnO-MIPs, ZnO-SiO<sub>2</sub> and ZnO.

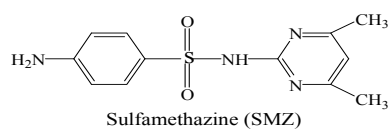

Sulfamethazine (SMZ)

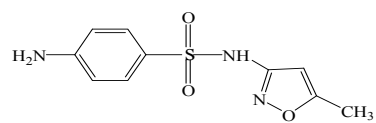

Sulfamethizol (SMI)

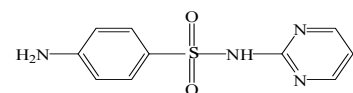

Sulfadiazine (SD)

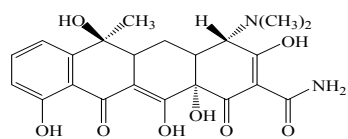

Tetracycline (TC)

**Fig. S5** Chemical Structures of SMZ, SMI, SD and TC.
